# Supplementary material for: Bisphosphonate use after clinical fracture and risk of new fracture
Source: Springer Nature journal article supplement (doi:10.1007/s00198-017-4367-7), 2018-02-03
Supplement: MOESM2 [file 15436924]

**Supplemental Fig. 2** Hazard ratios (95% confidence intervals [CIs]) for injurious fall without fracture after the initiation of bisphosphonate treatment (nonusers as reference group). The P-value test for a trend
