# Supplementary material for: Bisphosphonate use after clinical fracture and risk of new fracture
Source: Springer Nature journal article supplement (doi:10.1007/s00198-017-4367-7), 2018-02-03
Supplement: MOESM3 [file 15436924]

**Supplemental Fig. 3** Hazard ratios (95% confidence intervals [CIs]) for fractures before and after the initiation of bisphosphonate treatment (nonusers as reference group) in a sensitivity analysis of the definition of new fracture. The p-values test for trends in the period after the initiation of treatment
