# Supplementary material for: Bisphosphonate use after clinical fracture and risk of new fracture
Source: Springer Nature journal article supplement (doi:10.1007/s00198-017-4367-7), 2018-02-03
Supplement: MOESM4 [file 15436924]

**Supplemental Fig. 4** Sensitivity analysis in which bisphosphonate users were censored on the date of final filled prescriptions. Unadjusted hazard ratios and 95% confidence intervals for fractures after the initiation of bisphosphonate therapy (nonusers as reference group). P-values test for trends in the period after the initiation of treatment
