# Supplementary material for: Bisphosphonate use after clinical fracture and risk of new fracture
Source: Springer Nature journal article supplement (doi:10.1007/s00198-017-4367-7), 2018-02-03
Supplement: MOESM5 [file 15436924]

**Supplemental Table 1** Adjusted hazard ratios with 95% confidence intervals comparing bisphosphonate users and nonusers (reference group) for fractures and renal failure

| **Outcome** | **Prior to treatment** | **Months after initiation of treatment** | | | | |
| --- | --- | --- | --- | --- | --- | --- |
|  |  | **0-5** | **6-11** | **12-17** | **18-23** | **24-** |
|  |  |  |  |  |  |  |
| Any clinical | 2.35 | 1.33 | 1.25 | 0.98 | 0.97 | 0.98 |
| fracturea | 2.24-2.46 | 1.24-1.43 | 1.14-1.38 | 0.86-1.10 | 0.84-1.12 | 0.89-1.07 |
| Women | 2.36 | 1.31 | 1.24 | 1.00 | 0.97 | 0.97 |
|  | 2.25-2.48 | 1.22-1.41 | 1.12-1.36 | 0.88-1.14 | 0.83-1.13 | 0.88-1.07 |
| Men | 2.37 | 1.54 | 1.45 | 0.81 | 1.03 | 1.10 |
|  | 2.05-2.72 | 1.25-1.90 | 1.09-1.92 | 0.53-1.22 | 0.65-1.62 | 0.78-1.56 |
| 50-79 yr | 2.50 | 1.38 | 1.34 | 0.96 | 1.02 | 1.02 |
|  | 2.36-2.65 | 1.27-1.50 | 1.20-1.50 | 0.82-1.12 | 0.86-1.21 | 0.91-1.14 |
| ≥80 yr | 2.07 | 1.23 | 1.10 | 1.00 | 0.83 | 0.92 |
|  | 1.91-2.25 | 1.08-1.39 | 0.93-1.30 | 0.82-1.23 | 0.64-1.08 | 0.77-1.01 |
| Hip | 2.51 | 1.37 | 0.99 | 0.89 | 0.67 | 0.86 |
| fracturea | 2.28-2.77 | 1.18-1.60 | 0.83-1.18 | 0.72-1.11 | 0.52-0.87 | 0.73-1.01 |
| Women | 2.44 | 1.33 | 1.00 | 0.87 | 0.63 | 0.85 |
|  | 2.20-2.71 | 1.12-1.57 | 0.83-1.21 | 0.69-1.11 | 0.48-0.84 | 0.72-1.01 |
| Men | 3.09 | 1.69 | 0.94 | 1.10 | 1.00 | 0.92 |
|  | 2.40-3.98 | 1.13-2.52 | 0.57-1.55 | 0.59-2.03 | 0.48-2.11 | 0.55-1.55 |
| 50-79 yr | 3.22 | 1.57 | 1.11 | 1.06 | 0.66 | 1.03 |
|  | 2.81-3.69 | 1.26-1.95 | 0.87-1.41 | 0.79-1.44 | 0.46-0.95 | 0.84-1.27 |
| ≥80 yr | 1.89 | 1.20 | 0.88 | 0.75 | 0.67 | 0.68 |
|  | 1.64-2.18 | 0.96-1.49 | 0.67-1.15 | 0.54-1.04 | 0.45-0.98 | 0.53-0.88 |
| Renal | - | 0.96 | 0.92 | 0.89 | 0.97 | 1.09 |
| failureb |  | 0.66-1.40 | 0.61-1.39 | 0.55-1.45 | 0.59-1.60 | 0.82-1.45 |

Abbreviations: HR, hazard ratio; CI, confidence interval

a Adjusted for: rheumatoid arthritis, chronic obstructive pulmonary disease, cancer, depression, diabetes, stroke, dementia, myocardial infarction, renal failure, and (for the period after initiation of treatment) any new clinical fracture between initial fracture and initiation of treatment in bisphosphonate users (baseline)

b Adjusted for:same as in a but not renal failure
