# Supplementary material for: Bisphosphonate use after clinical fracture and risk of new fracture
Source: Springer Nature journal article supplement (doi:10.1007/s00198-017-4367-7), 2018-02-03
Supplement: MOESM6 [file 15436924]

| **Outcome** | **Prior to treatment** | **Months after initiation of treatment** | | | | |
| --- | --- | --- | --- | --- | --- | --- |
|  |  | **0-5** | **6-11** | **12-17** | **18-23** | **24-** |
|  |  |  |  |  |  |  |
| Any clinical |  |  |  |  |  |  |
| fracture |  |  |  |  |  |  |
| BP users | 93.2 (2032) | 46.2 (468) | 33.9 (294) | 31.7 (232) | 30.9 (188) | 31.6 (559) |
| Nonusers | 31.5 (1942) | 36.1 (1034) | 28.3 (698) | 27.0 (560) | 30.3 (518) | 28.8 (1407) |
| Hip |  |  |  |  |  |  |
| fracture |  |  |  |  |  |  |
| BP users | 31.8 (531) | 22.4 (135) | 30.4 (100) | 37.8 (84) | 35.1 (58) | 43.6 (154) |
| Nonusers | 11.3 (527) | 12.9 (219) | 11.2 (104) | 10.4 (65) | 10.7 (50) | 9.2 (89) |

**Supplemental Table 2** Incidence ratesa (nos. of cases) of fractures in a sensitivity analysis of the definition of new fracture

Abbreviation: BP, bisphosphonate

a Per 1000 person-years
